# Supplementary material for: ULK1 promotes metastatic progression in epithelial ovarian cancer
Source: Research Square preprint supplement (doi:10.21203/rs.3.rs-6148090/v1), 2025-04-16
Supplement: Supplementary file 1 [file 787871b2bda3700841548ff2.docx]

**SUPPLEMENTAL FIGURE LEGENDS**

**Supplemental** **Figure 1**

OVCAR8 (A), HEYA8 (B), and FT190 (C) parental and *ULK1*KO cells were seeded in spheroid culture. Protein lysates were harvested 4, 8, 24, 48, and 72 h after seeding for western blot analysis. B) Densitometric autophagy markers and ULK1 activity (n=3) relative to expression in parental 4 h spheroids. Data displayed as mean ± SEM; Student’s t-test, *P<0.05.

**Supplemental Figure 2**

A) OVCAR8 parental and *ULK1*KO cells were seeded in adherent and spheroid culture. Protein lysates were harvested 72 h after seeding for western blot analysis of ULK1 activity. Densitometric analysis expression of p-ATG16L1 (S278) in OVCAR8 cells relative to expression in parental adherent conditions (n=3). Data displayed as mean ± SEM; Two-way ANOVA followed by Šidák’s multiple comparisons test, *P<0.01.

**Supplemental Figure 3**

A) Brightfield microscopy images of cells seeded in spheroid culture using 24-well ULA plates. Cells were cultured as spheroids for 3-, 7-, and 10-days before imaging and subsequent Trypan Blue Exclusion Assay. Images were captured using a Leica DMI 400B inverted microscope. Scale bar represents 1mm. B) Doubling time values for adherent and spheroid cells. Cells expressing Nuclight GFP were seeded in a 96-well flat bottom and ULA round bottom plate, respectively. Doubling time was calculated on GraphPad Prism 10 using the Green Object Count and Green Mean Intensity feature for adherent and spheroids, respectively. Data displayed as mean ± SEM. Student’s *t*-test, *P<0.05.

**Supplemental Figure 4**

A) EOC parental and *ULK1*KO cells were grown as organoids and images were captured for up to 21 days using the IncuCyte S3 Live-Cell Analysis System. Organoid area was quantified using the IncuCyte S3 Live-Cell Analysis System. Data reflects total organoid area and number and displayed as mean ± SEM. B) Cells expressing tdTomato were cultured as spheroids for 24 h, then seeded onto standard tissue culture plastic, and imaged after an additional 24 h. The area of dispersion was then quantified using Fiji. The data represents the total RFP area, normalized to the original size of the spheroid and relative to the parental conditions, presented as the mean ± SEM. Scale bars represent the spheroid area as follows: 400µm for general spheroid measurements, 400µm for OVCAR8 reattached spheroids, and 300µm for HEYA8 reattached spheroids. C) A scratch wound assay was performed on confluent monolayer of EOC cells. The data reflects relative wound area and is displayed as mean ± SEM. Multiple Student’s *t*-test, *P<0.05.

**Supplemental Figure 5**

A) Kaplan-Meier survival analysis shows the overall survival (in days) of mice injected with EOC parental and *ULK1*KO cells. Dotted line reflects median survival (OVCAR8 parental; 61.5d, ULK1KO; 57d, HEYA8 parental; 38d, *ULK1*KO; 40d). B) Serial sections were stained with hematoxylin and eosin (H&E), and immunostained using Ki67 for proliferation and cleaved caspase-3 for apoptosis. Scale bars represent 600 mm and 200 mm, respectively. Data displayed as mean number of Ki67 positive nuclei and Caspase-3 staining for each tumor and the overall mean. For every group, positivity was assessed in at least three independent tumors. Data displayed as mean ± SEM; D) OVCAR8 parental (233, 234) and *ULK1*KO (239, 240) cells derived from ascites fluid of xenografted mice were seeded in adherent and spheroid cultures. Protein lysates were harvested at 72 h after seeding for western blot analysis. Densitometric analysis of proteins are relative to their expression in parental adherent conditions. Data are displayed as mean ± SEM; Two-way ANOVA followed by Šidák’s multiple comparisons test, *P<0.01, **P<0.001, ****P<0.0001.

**Supplemental Figure 6**

A) OVCAR8 and HEYA8 *ULK1*KO cells were seeded in adherent and spheroid culture. Protein lysates were harvested 72 h after seeding for western blot analysis. Densitometric analysis of proteins are relative to expression in parental spheroids. Data displayed as mean ± SEM; Two-way ANOVA followed by Šidák’s multiple comparisons test, *P<0.01, **P<0.001, ****P<0.0001. B) OVCAR8 and HEYA8 parental and *ULK1*KO cells were seeded in spheroid culture. Protein lysates were harvested 72 h after seeding for western blot analysis. Densitometric analysis of proteins are relative to expression in parental spheroids. Data are displayed as mean ± SEM; Student’s t-test, *P<0.05.

**Supplemental Figure 7**

A) OVCAR8 parental (233, 234) and *ULK1*KO (239, 240) cells derived from ascites fluid of xenografted mice were seeded in adherent and spheroid cultures. Protein lysates were harvested at 72 h after seeding for western blot analysis. B) Densitometric analysis of autophagy markers and ULK1 activity, MAPK and mTOR-PI3K-AKT signaling in xenograft ascites cells relative to their expression in parental adherent conditions. Data are displayed as mean ± SEM; Two-way ANOVA followed by Šidák’s multiple comparisons test, *P<0.01, **P<0.001, ****P<0.0001. C) Ascites-derived spheroids expressing tdTomato were cultured for 24 h, then seeded onto standard tissue culture plastic, and imaged after an additional 24 h. The area of dispersion was then quantified using Fiji. The data represents the total RFP area, normalized to the original size of the spheroid and relative to the parental conditions, presented as the mean ± SEM. Multiple Student’s t-test, *P<0.05, **P<0.001. Scale bar: 500𝜇m. D) The mesothelial clearance assay was used to evaluate the invasiveness of ascites-derived EOC spheroids. Ascites-derived spheroids expressing tdTomato were cultured for 24 h and then seeded onto patient-derived mesothelial cells labeled with Ad-GFP, which were overlaid on a collagen matrix. Images were acquired after an additional 24 h. Displacement was quantified using Fiji software. The data represents the total RFP area, normalized to the original size of the spheroid and relative to the parental conditions, presented as the mean ± SEM. Scale bar represents 300𝜇M.
